# Supplementary material for: Optical chemosensors for environmental monitoring of toxic metals related to Alzheimer's disease
Source: Royal Society of Chemistry journal article supplement (doi:10.1039/d2ra05384e), 2022-01-01
Supplement: d2ra05384e1.pdf [file d2ra05384e1.pdf]

## **Supporting information**

### **Optical Chemosensors for environmental monitoring of toxic metals related to Alzheimer's Disease.**

Islam M. El-Sewify<sup>1,2</sup>, Ahmed Radwan<sup>1,2</sup>, Nehal H. Elghazawy<sup>2</sup>, Wolfgang Fritzsche<sup>3</sup>, Hassan M. E. Azzazy<sup>2,3\*</sup>

<sup>1</sup>Department of Chemistry, Faculty of Science, Ain Shams University, 11566, Abbassia, Cairo, Egypt

<sup>2</sup>Department of Chemistry, School of Sciences & Engineering, The American University in Cairo, SSE, Rm #1194, P.O. Box 74, New Cairo 11835, Egypt

<sup>3</sup>Department of Nanobiophotonics, Leibniz Institute for Photonic Technology, Jena 07745, Germany

#### *Corresponding Author*

Hassan Azzazy; Department of Chemistry, School of Sciences & Engineering  
The American University in Cairo, SSE, Rm #1194, P.O. Box 74, New Cairo 11835, Egypt  
Tel: +202 2615 2559  
E-mail: [hazzazy@aucegypt.edu](mailto:hazzazy@aucegypt.edu)

**Table S1. Drinking water quality guidelines ( $\mu\text{g L}^{-1}$ ) for heavy metals**

| Heavy Metal | Substrate | WHO | EU | US EPA | Oxidation States | Health Effects                                         |
|-------------|-----------|-----|----|--------|------------------|--------------------------------------------------------|
| Arsenic     | As        | 10  | 10 | 10     | III, V           | Skin damage, renal system failure, cancer [1,2].       |
| Cadmium     | Cd        | 3   | 5  | 5      | II               | Cardiovascular issues, osteoporosis, cancer [3].       |
| Lead        | Pb        | 10  | 10 | 15     | II               | Nervous system impairment, brain damage, cancer [4,5]. |
| Mercury     | Hg        | 1   | 1  | 2      | I, II            | Renal failure, neurological disorders, cancer [6,7].   |

**Note**

: Reprinted from “ A Review of Microfluidic Detection Strategies for Heavy Metals in Water” by Lacey, A. and Cleary, J., 2021, *Chemosensors*, 9, 60.

## References

1. B.K. Mandal, K.T. Suzuki, Arsenic round the world: A review. *Talanta* 58, (2002)201–235.
2. Kapaj, S.; Peterson, H.; Liber, K.; Bhattacharya, P. Human health effects from chronic arsenic poisoning—A review. *J. Environ. Sci. Health Part A* 41(2006)2399–2428.
3. Rahimzadeh, M.R.; Rahimzadeh, M.R.; Kazemi, S.; Moghadamnia, A.A. Cadmium toxicity and treatment: An update. *Casp. J. Intern. Med.* 8(2017)135.
4. M.R. Asgharipour, A.R. Sirousmehr, Comparison of three techniques for estimating phytotoxicity in municipal solid waste compost. *Ann. Biol. Res.*, 3(2012)1094–1101.
5. M. Vilar, J. Barciela, S. García-Martín, R.M. Pena, C. Herrero, Comparison of different permanent chemical modifiers for lead determination in Orujo spirits by electrothermal atomic absorption spectrometry. *Talanta*, 71(2007)1629–1636.
6. H. Satoh, Occupational and environmental toxicology of mercury and its compounds. *Ind. Health*, 38(2000)153–164.
7. J.F. Risher, S.N. Amler, Mercury exposure: Evaluation and intervention: The inappropriate use of chelating agents in the diagnosis and treatment of putative mercury poisoning. *Neurotoxicology*, 26(2005)691–699.
